# Supplementary material for: Germanosilicate zeolite ITQ-44 with extra-large 18-rings synthesized using a commercial quaternary ammonium as a structure-directing agent
Source: Royal Society of Chemistry journal article supplement (doi:10.1039/c5ra09942k), 2015-01-01
Supplement: c5ra09942k1.pdf [file c5ra09942k1.pdf]

**Supporting information's:**

**Germanosilicate zeolite ITQ-44 with extra-large 18-rings synthesized by using commercial quaternary ammonium as structure-directing agent**

Kun Qian,<sup>\*ab</sup> Yilin Wang,<sup>b</sup> Zhiqiang Liang,<sup>b</sup> Jiyang Li<sup>\*b</sup>

<sup>a</sup> Liaoning Medical University, Jinzhou 121001, P. R. China.

<sup>b</sup> State Key Laboratory of Inorganic Synthesis and Preparative Chemistry, College of Chemistry, Jilin University, Changchun 130012, P. R. China.

**Table S1** The products obtained in the reaction gel with molar composition of  $m\text{SiO}_2$ :  $n\text{GeO}_2$ :  $0.25\text{SSDAOH}$ :  $y\text{NH}_4\text{F}$ :  $(0.25-y)\text{NH}_4\text{Cl}$ :  $x\text{H}_2\text{O}$  ( $x = 1-3$ ;  $y = 0-0.25$ ;  $m+n=1$  and  $n/m=0.5-1.0$ ) at 170 °C for 1 day.

| F/T  | Ge/Si=0.5            |                      | Ge/Si=1.0            |                      |
|------|----------------------|----------------------|----------------------|----------------------|
|      | H <sub>2</sub> O/T=1 | H <sub>2</sub> O/T=2 | H <sub>2</sub> O/T=1 | H <sub>2</sub> O/T=2 |
| 0.25 | ITQ-44               | ITQ-44               | ITQ-44               | ITQ-44               |
| 0.20 | ITQ-44               | ITQ-44               | ITQ-44               | ITQ-44               |
| 0.10 | ITQ-44               | ITQ-44               | ITQ-44               | ITQ-44               |
| 0.05 | ITQ-44               | ITQ-44               | ITQ-44               | ITQ-44               |
| 0    | ITQ-                 | ITQ-                 | ITQ-                 | ITQ-                 |
|      | 44+GeO <sub>2</sub>  | 44+GeO <sub>2</sub>  | 44+GeO <sub>2</sub>  | 44+GeO <sub>2</sub>  |

**Table S2** Products obtained in the reaction gel with molar composition of  $m\text{SiO}_2$ :  $n\text{GeO}_2$ :  $0.25\text{SDAOH}$ :  $0.25\text{NH}_4\text{F}$ :  $x\text{H}_2\text{O}$  ( $x=1-2$ ;  $m+n=1$ ,  $n/m=0.1-1.0$ ) at  $170^\circ\text{C}$  for 1-10 day.

| Ge/Si | Time (days) |           |                   |                   |
|-------|-------------|-----------|-------------------|-------------------|
|       | 1           | 5         | 7                 | 10                |
| 0.1   | Amorphous   | Amorphous | Amorphous         | Amorphous         |
| 0.5   | ITQ-44      | ITQ-44    | ITQ-44            | ITQ-44            |
| 1.0   | ITQ-44      | ITQ-44    | ITQ-44+ITQ-<br>17 | ITQ-44+ITQ-<br>17 |

**Table S3** Products obtained in the reaction gel with molar composition of  $m\text{SiO}_2$ :  $n\text{GeO}_2$ :  $0.25\text{SDAOH}$ :  $0.25\text{NH}_4\text{F}$ :  $x\text{H}_2\text{O}$  ( $x=1-2$ ;  $m+n=1$ ,  $n/m=0.1-1.0$ ) at 140-200 °C for 1 day.

| Ge/Si | Temperature (°C) |           |           |           |           |
|-------|------------------|-----------|-----------|-----------|-----------|
|       | 140              | 150       | 160       | 170       | 200       |
| 0.1   | Amorphous        | Amorphous | Amorphous | Amorphous | Amorphous |
| 0.5   | Amorphous        | ITQ-44    | ITQ-44    | ITQ-44    | ITQ-44    |
| 1.0   | Amorphous        | ITQ-44    | ITQ-44    | ITQ-44    | ITQ-44    |

**Table S4** ICP analysis of the M-ITQ-37 obtained from the reaction system of 0.5SiO<sub>2</sub>: 0.5GeO<sub>2</sub>: zM<sub>2</sub>O<sub>3</sub>: 0.25OSDAOH: 0.20NH<sub>4</sub>F: 0.05NH<sub>4</sub>Cl: 5H<sub>2</sub>O at 170 °C for 24 hours.

| M source                       | M/ (Si+Ge) |      |      |
|--------------------------------|------------|------|------|
|                                | 0.01       | 0.05 | 0.10 |
| Al(OH) <sub>3</sub>            | 0.01       | 0.04 | 0.07 |
| Fresh Al(OH) <sub>3</sub>      | 0.01       | 0.04 | 0.09 |
| B <sub>2</sub> O <sub>3</sub>  | 0.01       | —    | —    |
| Ga <sub>2</sub> O <sub>3</sub> | 0.01       | —    | —    |

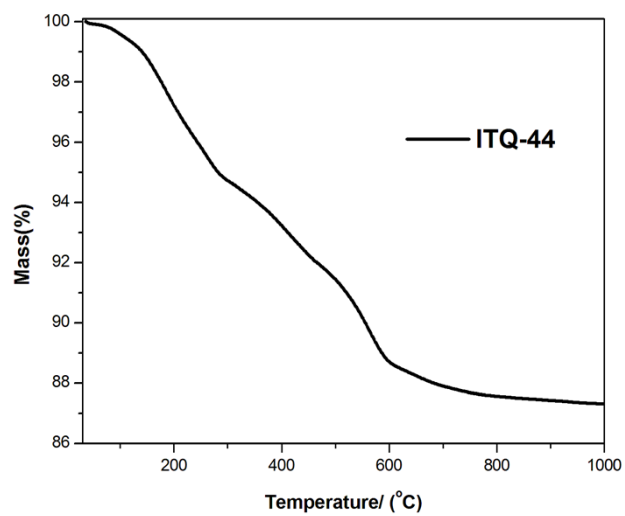

**Fig. S1** The TG curve of as-synthesized ITQ-44.

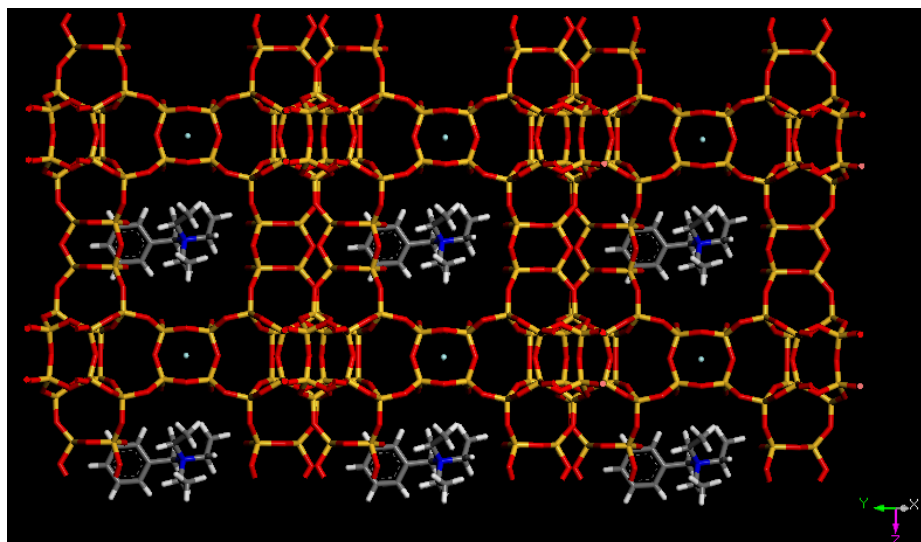

**Fig. S2** The positions of SDA-1 cations in ITQ-44.

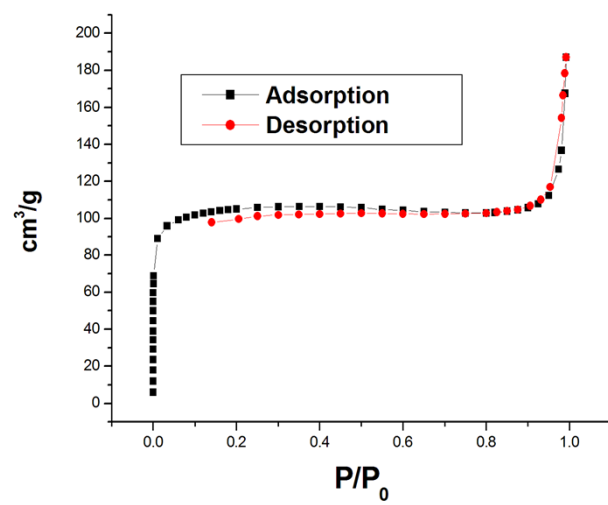

**Fig. S3** The N<sub>2</sub> adsorption and desorption isotherms of calcined ITQ-44.

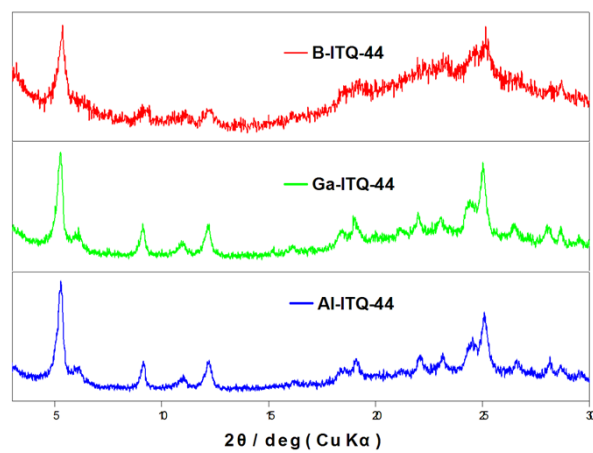

**Fig. S4** The XRD patterns of as-synthesized M-ITQ-44.
